# Supplementary material for: Zincophilic Sn sites induced the local ion enrichment for compact and homogenous growth of Zn biscuits in long-life Zn metal batteries
Source: Royal Society of Chemistry journal article supplement (doi:10.1039/d3ta06613d), 2024-01-01
Supplement: d3ta06613d1.pdf [file d3ta06613d1.pdf]

## Supporting Information

### **Zincophilic Sn Sites Induced the Local Ion Enrichment for the Compact and Homogenous Zn Biscuit Growth in the Long-Life Zn Metal Batteries**

Tiancun Liu,<sup>\*a</sup> Yi Xu,<sup>b</sup> Haoyan Fang,<sup>b</sup> Ling Chen,<sup>b</sup> Jiadi Ying,<sup>a</sup> Min Guo,<sup>a</sup> Yeqing Wang,<sup>a</sup> Qi Shen,<sup>a</sup> Xusheng Wang,<sup>c</sup> Yong Wang<sup>\*b</sup> and Zhixin Yu<sup>\*a</sup>

*<sup>a</sup>Institute of New Energy, School of Chemistry and Chemical Engineering, Shaoxing University, Zhejiang, Shaoxing 312000, People's Republic of China*

*<sup>b</sup>Department of Chemical Engineering, School of Environmental and Chemical Engineering, Shanghai University, Shanghai 200444, People's Republic of China*

*<sup>c</sup>School of Materials Science and Engineering, Zhejiang Sci-Tech University, Hangzhou 310018, People's Republic of China*

Email address: [liutc@usx.edu.cn](mailto:liutc@usx.edu.cn); [yongwang@shu.edu.cn](mailto:yongwang@shu.edu.cn); [zhixin.yu@usx.edu.cn](mailto:zhixin.yu@usx.edu.cn)

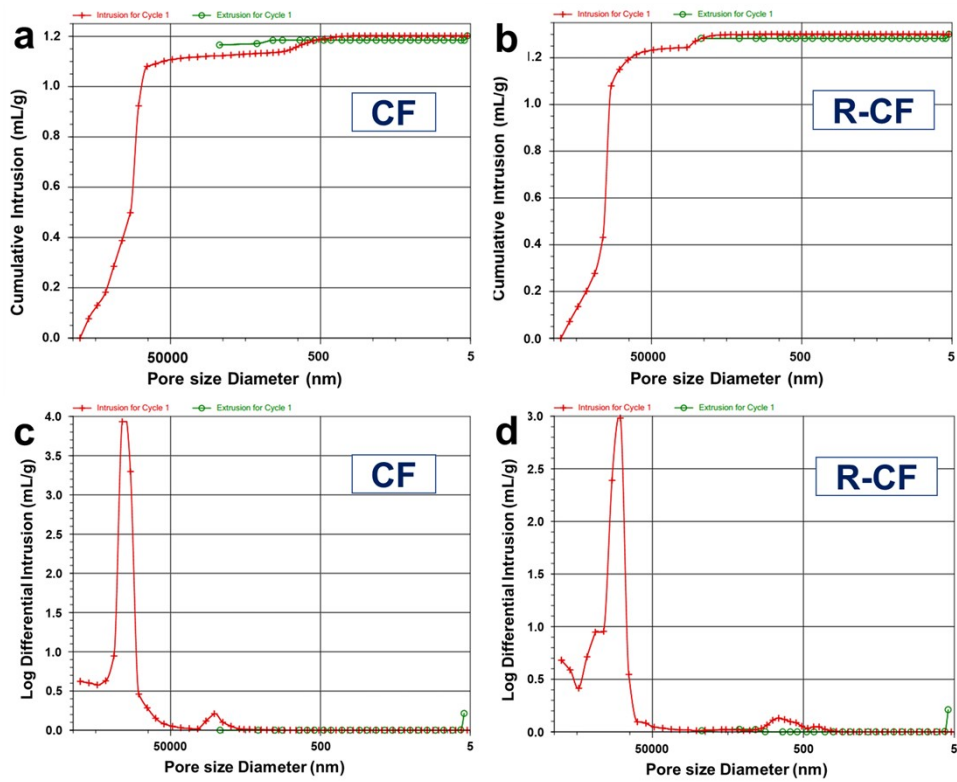

**Fig. S1** Intrusion and extrusion plot and pore size distribution of (a, c) bare CF and (b, d) R-CF substrate.

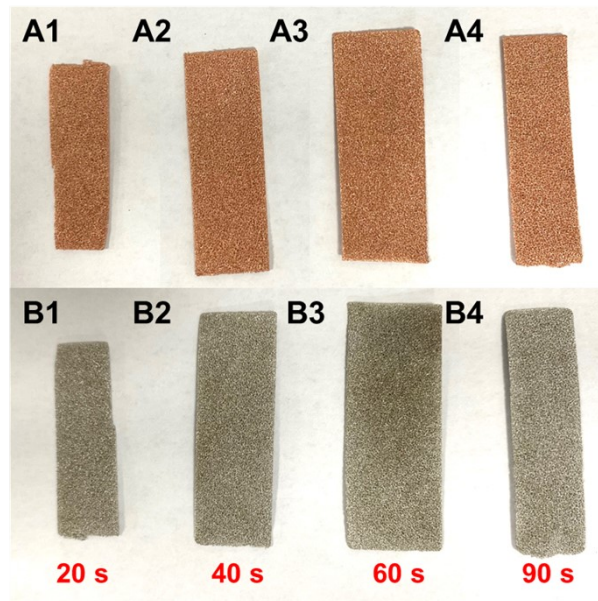

**Fig. S2** Optical images of R-CF (A1-A4) and related skeletons with Sn decoration at different immersion time (B1-B4).

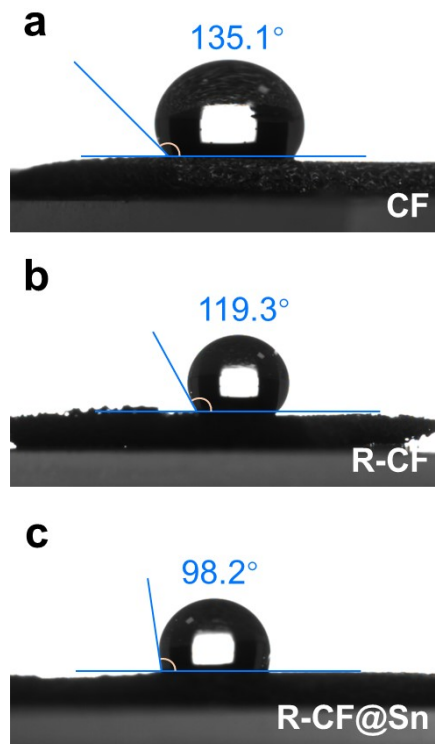

**Fig. S3** Experiments about contact angle test on CF, R-CF and R-CF@Sn substrates.

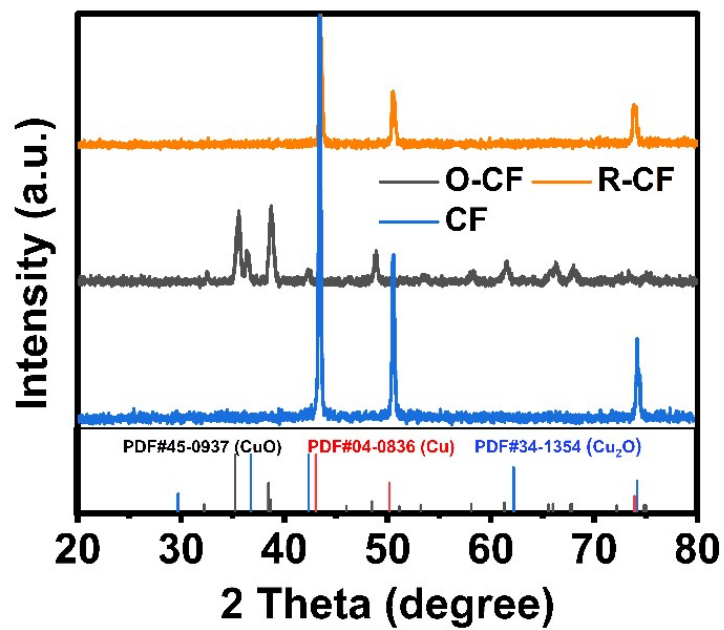

Fig. S4 XRD patterns of CF, O-CF and R-CF skeleton.

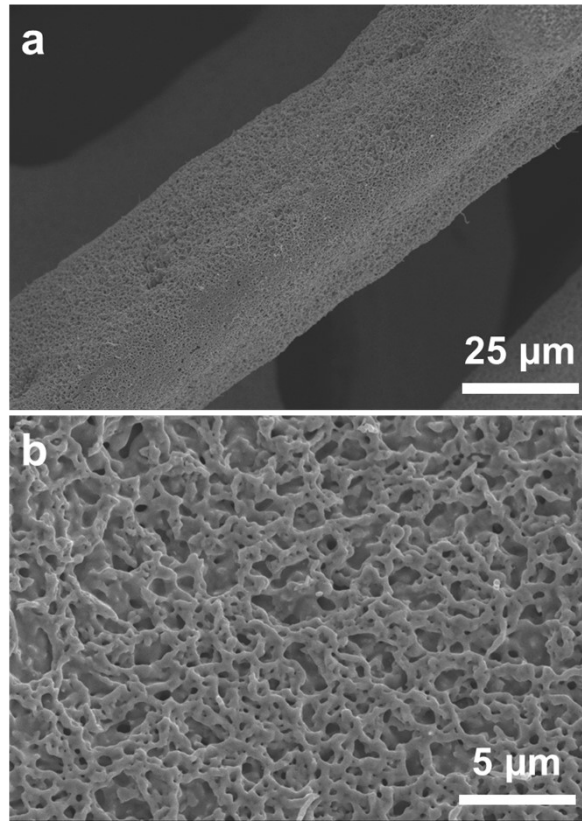

**Fig. S5** SEM image of obtained R-CF skeleton.

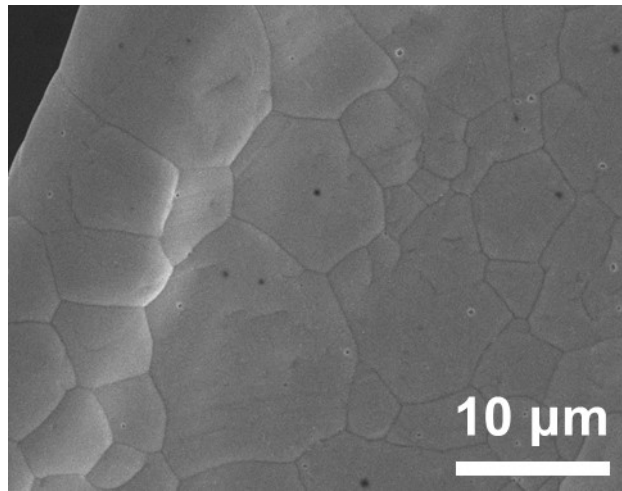

**Fig. S6** SEM image of cleaned CF skeleton.

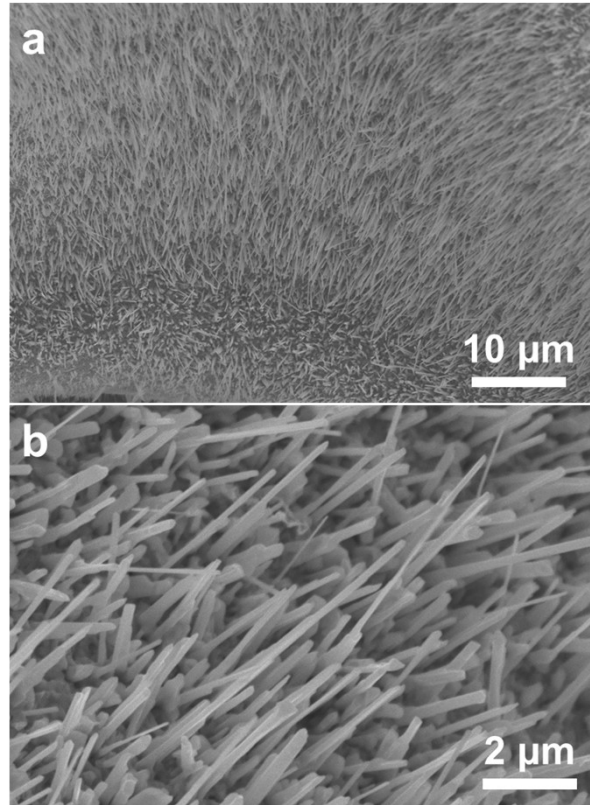

**Fig. S7** SEM image of irregular O-CF with numerous nanoneedles.



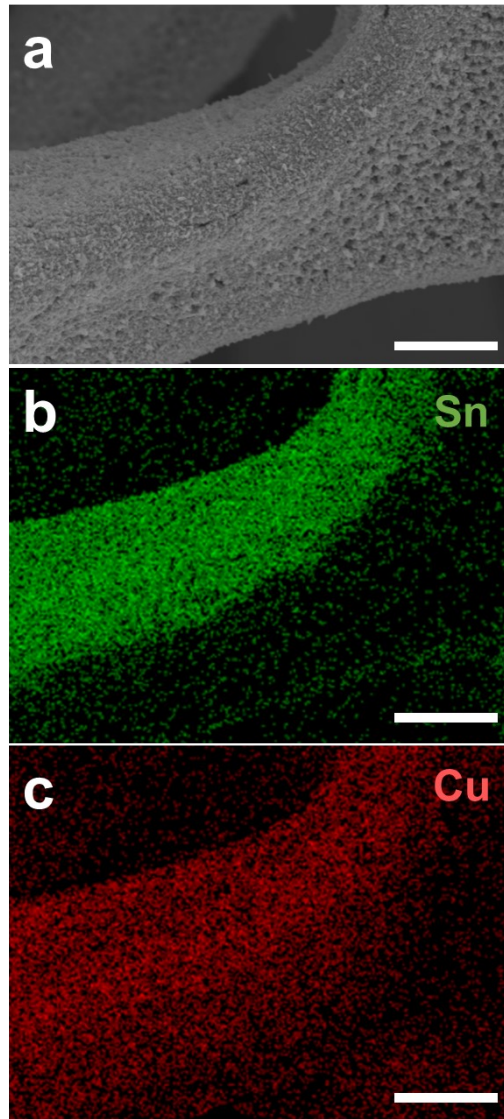

**Fig. S8** (a) SEM image of R-CF@Sn skeleton and related element mappings of (b) Sn and (c) Cu. Each bar is 25  $\mu\text{m}$ .

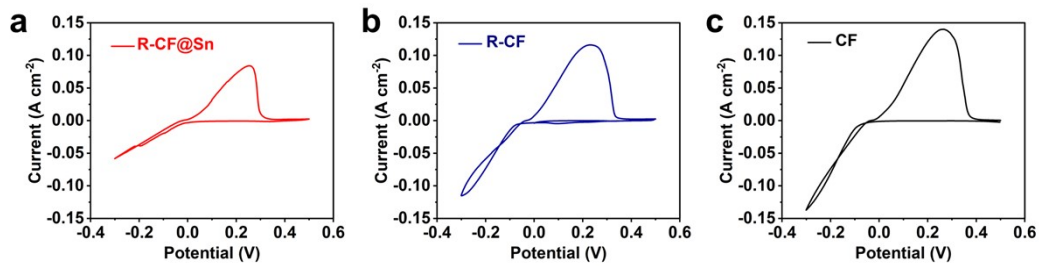

**Fig. S9** Cyclic voltammety curves of different electrodes.

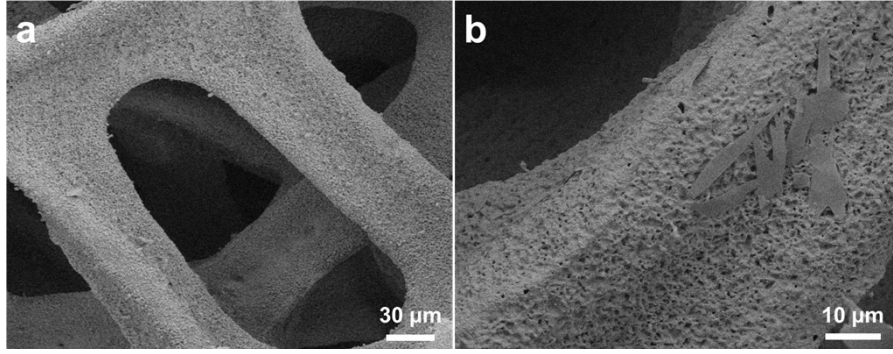

**Fig. S10** The morphology of the R-CF@Sn electrode after 300 cycles at the condition of  $5 \text{ mA cm}^{-2}$  and  $1 \text{ mAh cm}^{-2}$ .

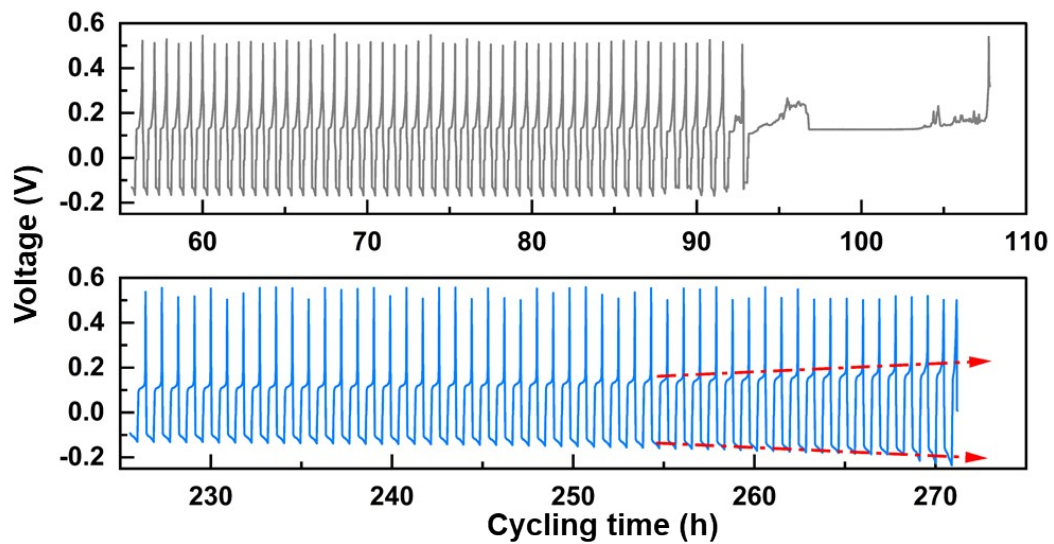

**Fig. S11** Time-voltage plots at the last 50 cycles of CF (grey color) and R-CF skeletons (blue color).

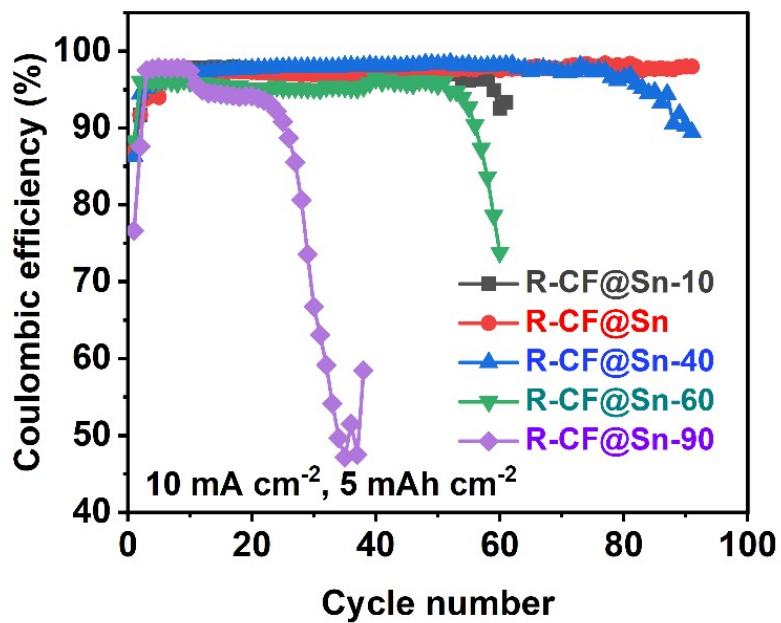

**Fig. S12** Coulombic efficiency comparison of various skeletons containing zincophilic Sn decoration under the reaction time of 10, 20, 40, 60 and 90 s.

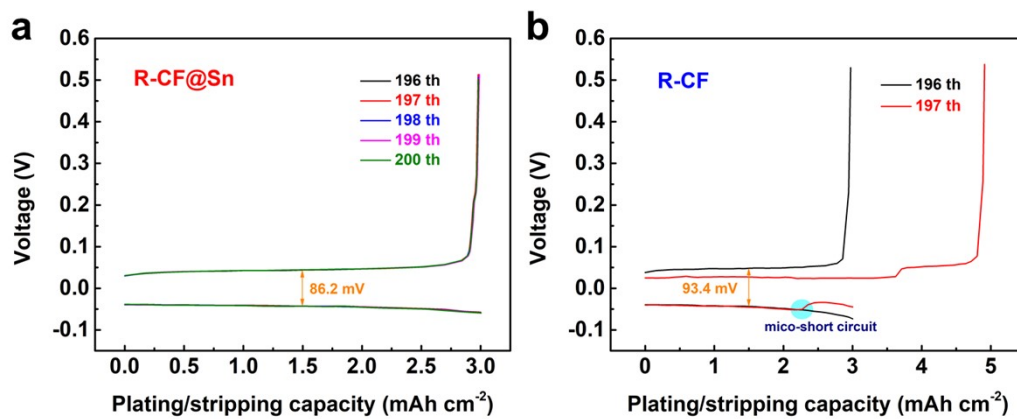

**Fig. S13** Voltage-capacity plots of (a) R-CF@Sn (from 196<sup>th</sup> to 200<sup>th</sup> cycle) and (b) R-CF (196<sup>th</sup> and 197<sup>th</sup> cycle).

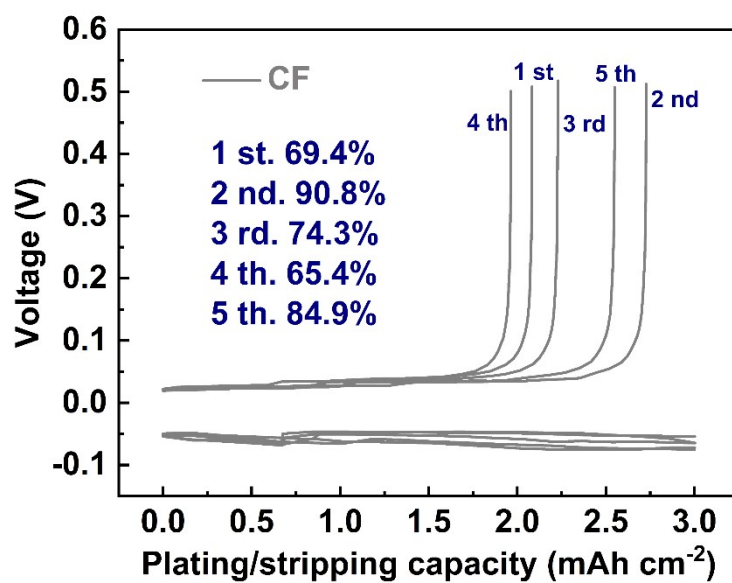

**Fig. S14** Related voltage-capacity plots of bare CF at last 5 cycles when cycled at 10 mA cm<sup>-2</sup> with 3 mAh cm<sup>-2</sup>.

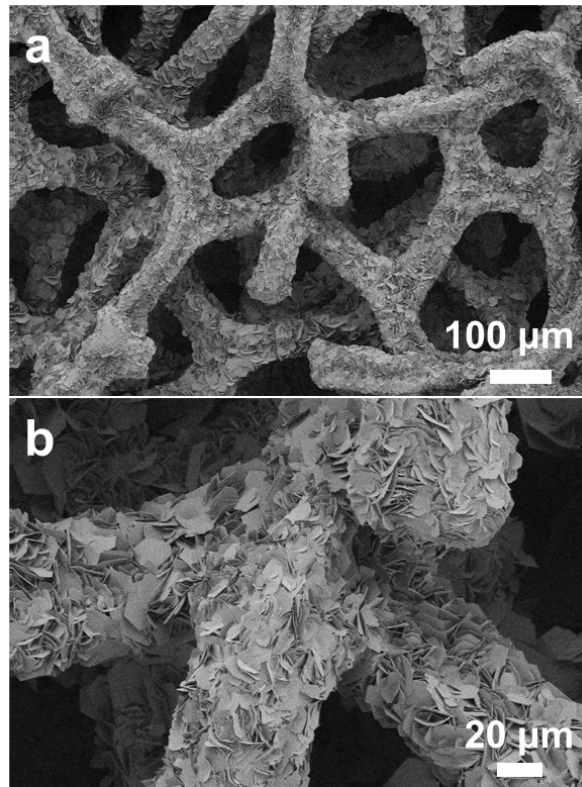

**Fig. S15** SEM images of (a-b) R-CF loading deposited Zn metal of  $3 \text{ mAh cm}^{-2}$ .



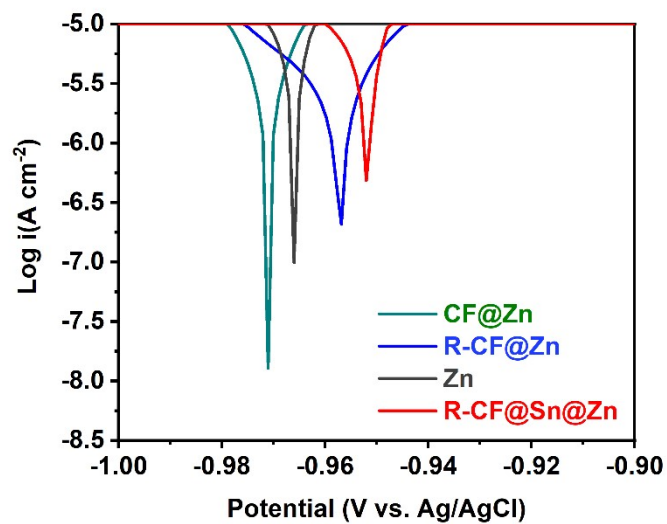

**Fig. S16** Tafel plots of different electrodes in a three-electrode system.

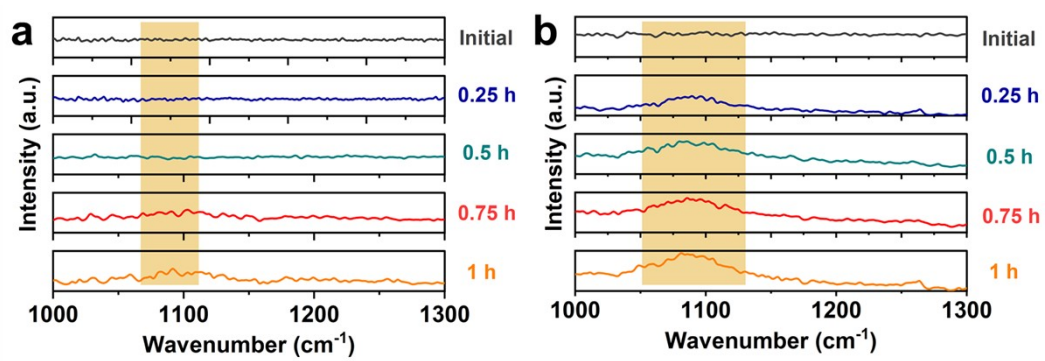

**Fig. S17** *In situ* FTIR spectra of continuous Zn plating on (a) R-CF@Sn and (b) bare CF substrate at the deposition current density of 3 mA cm<sup>-2</sup>.

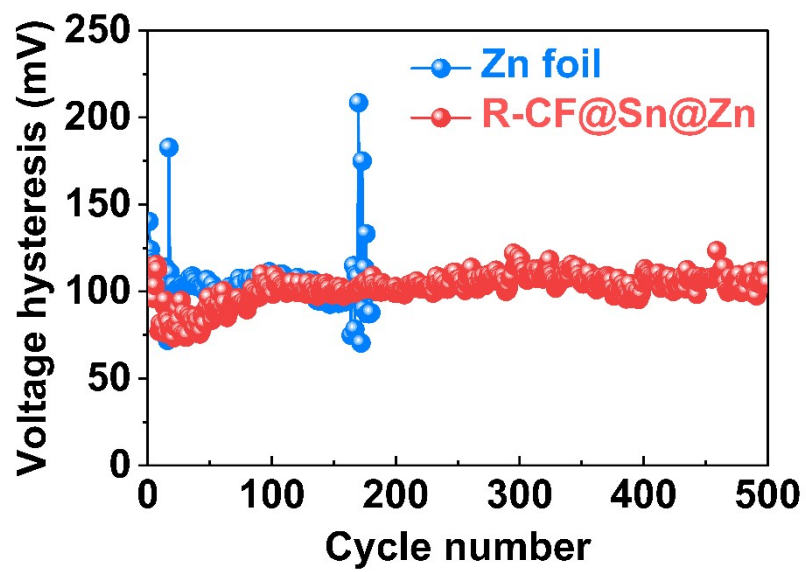

**Fig. S18** Results of voltage hysteresis of two cells based on Zn foil and R-CF@Sn@Zn electrodes.

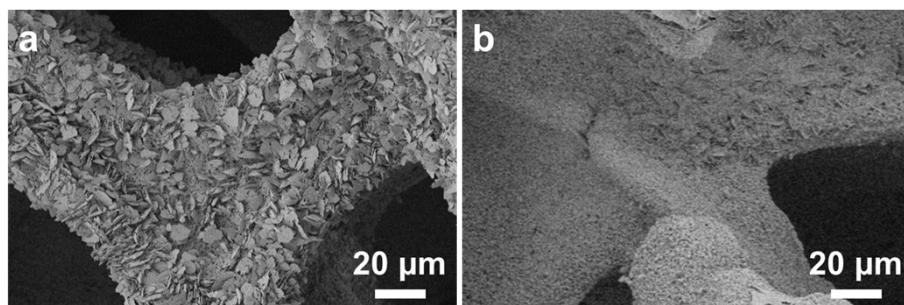

**Fig. S19** SEM images of R-CF@Sn@Zn electrodes after stripping Zn deposition of (a) 1 and (b) 3 mAh cm<sup>-2</sup>.

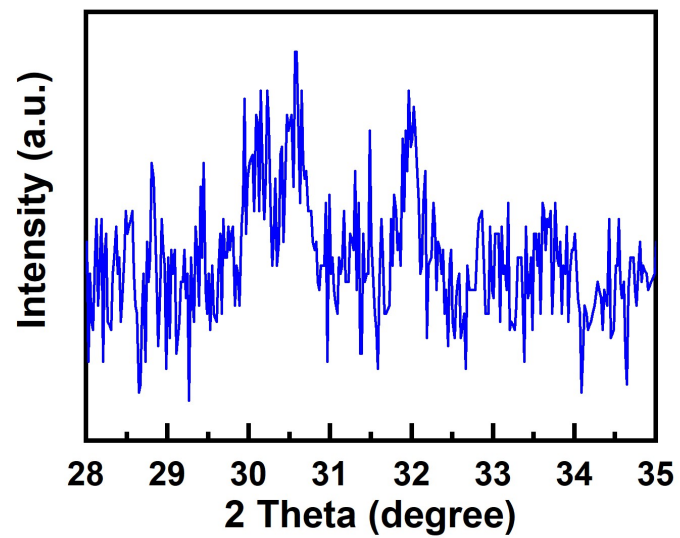

**Fig. S20** XRD pattern of R-CF@Sn@Zn electrode in a symmetric cell after 100 cycles.

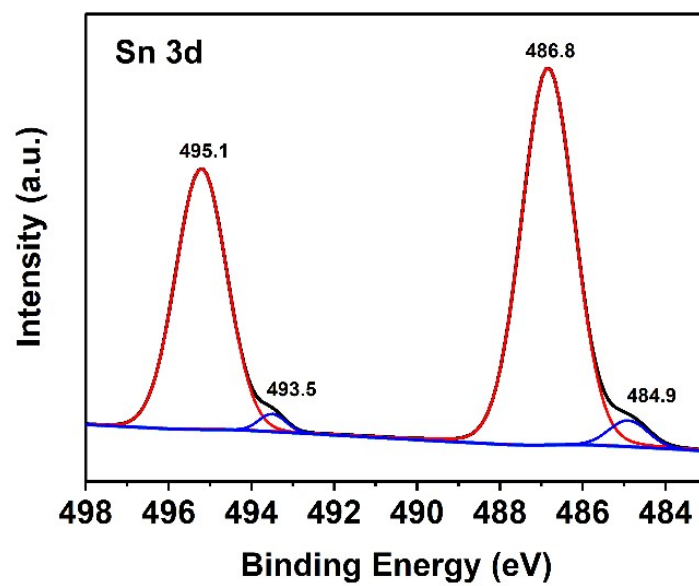

**Fig. S21** High-resolution XPS of Sn 3d of cycled R-CF@Sn@Zn electrode.

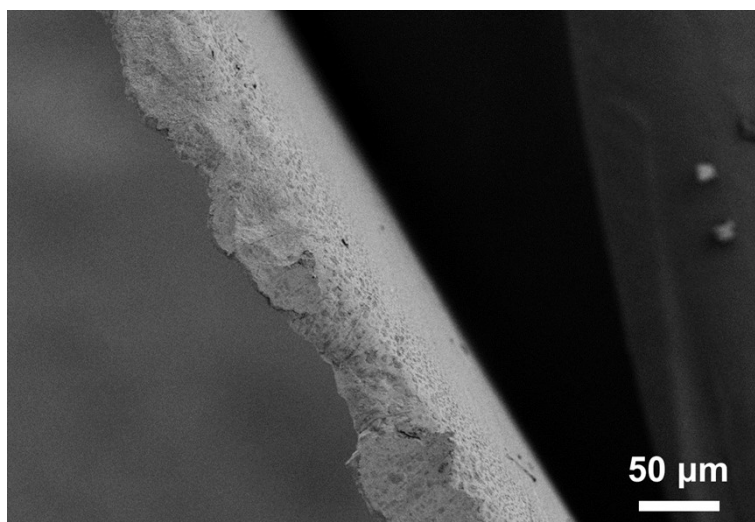

**Fig. S22** Cross-sectional SEM image of bare Zn foil.

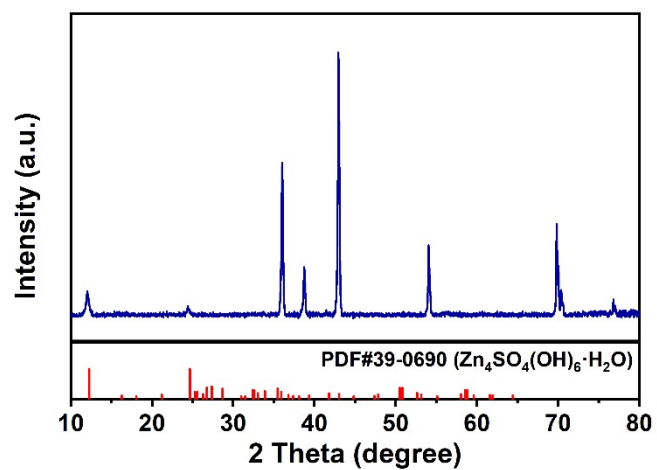

**Fig. S23** XRD pattern of cycled Zn electrode.



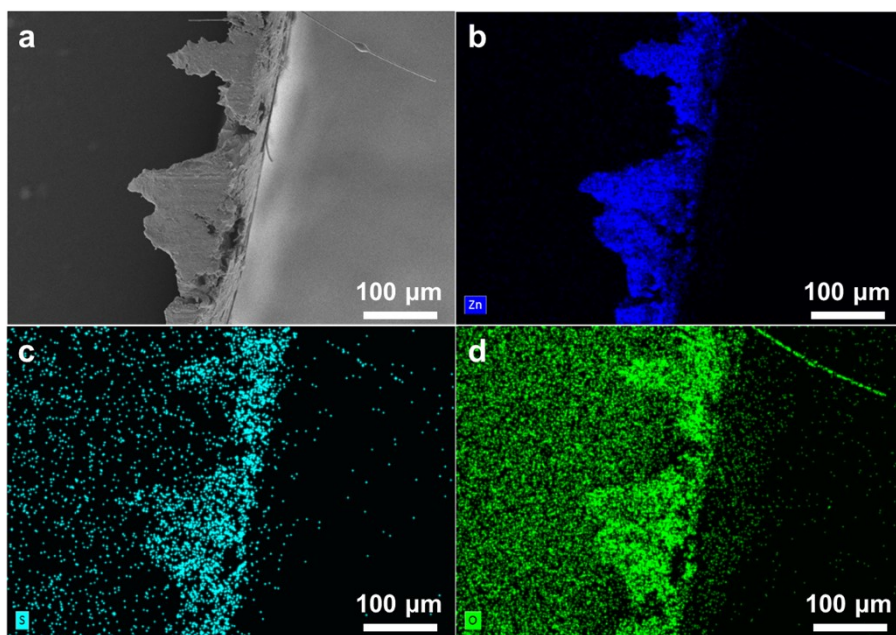

**Fig. S24** (a) Cross-sectional SEM image of Zn electrode after 100 cycles and corresponding element mappings of (b) Zn, (c) S and (d) O components.

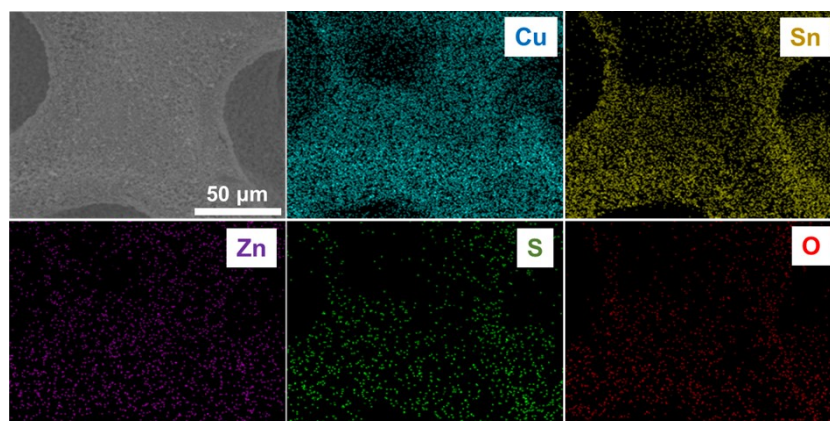

**Fig. S25** SEM image of R-CF@Sn electrode after 100 cycles and related element mappings of Cu, Sn, Zn, S and O.

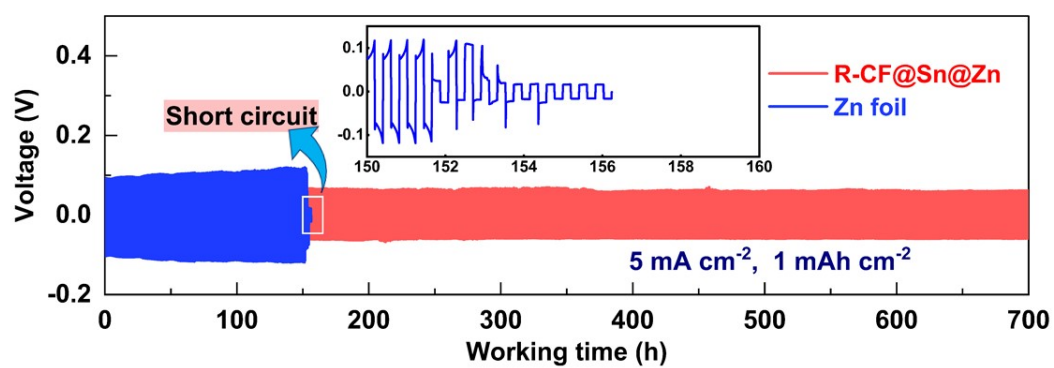

**Fig. S26** Galvanostatic charge-discharge profiles of symmetric cells with R-CF@Sn@Zn and Zn foil at 5 mA cm<sup>-2</sup> with 1 mAh cm<sup>-2</sup>.

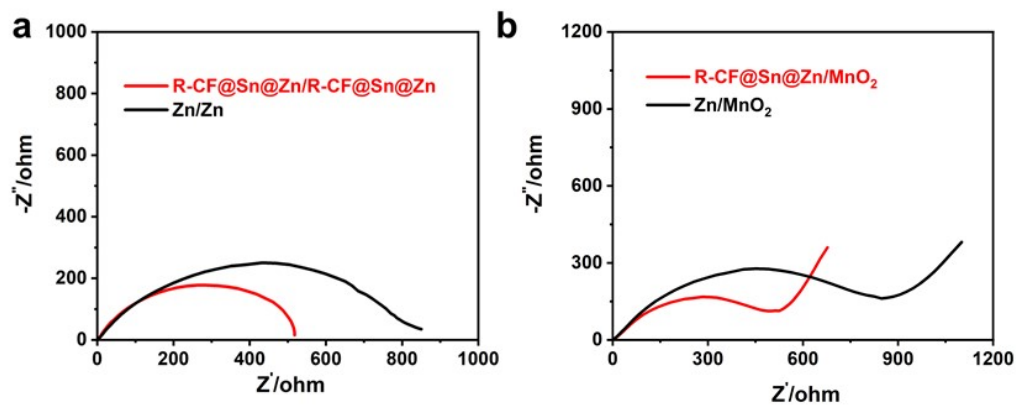

**Fig. S27** Electrochemical impedance spectroscopy of R-CF@Sn@Zn and Zn electrode in (a) symmetric and (b) full cells.

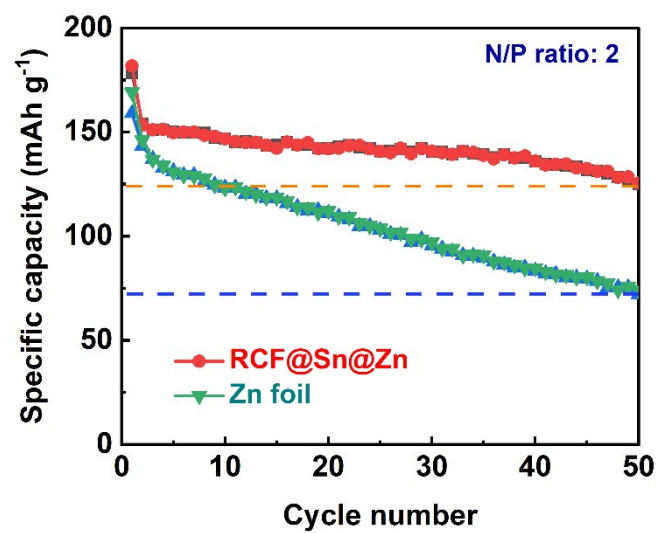

**Fig. S28** Long-term cycling plots of cells with a low N/P ratio of 2 at 2 A g<sup>-1</sup>.

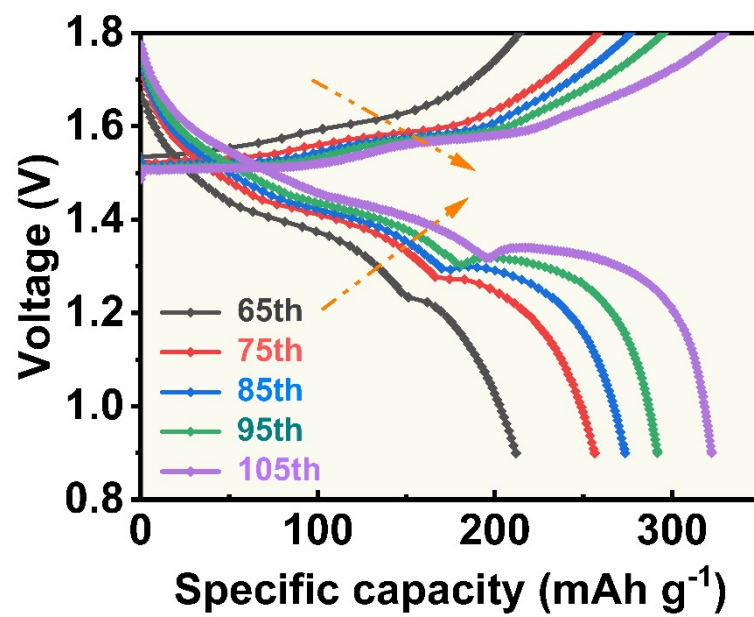

**Fig. S29** Voltage-capacity profiles at different cycles in the reversible rate process of the cells with R-CF@Sn@Zn.

**Table S1** Electrochemical properties comparison of the R-CF@Sn and relative 3D self-supporting and porous frameworks.

| <b>Current collectors</b> | <b>Working condition</b>                           | <b>Lifespan</b> | <b>Ref.</b> |
|---------------------------|----------------------------------------------------|-----------------|-------------|
| Sn@NHCF host              | 1 mA cm <sup>-2</sup> , 1 mAh cm <sup>-2</sup>     | 370 h           | 1           |
| N-VG@CC                   | 0.5 mA cm <sup>-2</sup> , 0.5 mAh cm <sup>-2</sup> | 150 h           | 2           |
|                           | 1 mA cm <sup>-2</sup> , 1 mAh cm <sup>-2</sup>     | 70 h            |             |
| 3D CNT framework          | 2 mA cm <sup>-2</sup> , 2 mAh cm <sup>-2</sup>     | 200 h           | 3           |
| ACC-600@Cu <sup>2+</sup>  | 1 mA cm <sup>-2</sup> , 1 mAh cm <sup>-2</sup>     | 425 h           | 4           |
| O, N-CC                   | 1 mA cm <sup>-2</sup> , 1 mAh cm <sup>-2</sup>     | 320 h           | 5           |
| PAN-Cu                    | 2 mA cm <sup>-2</sup> , 1 mAh cm <sup>-2</sup>     | 275h            | 6           |
| PCF                       | 1 mA cm <sup>-2</sup> , 1 mAh cm <sup>-2</sup>     | 750 h           | 7           |
| carbon foam               | 1 mA cm <sup>-2</sup> , 1 mAh cm <sup>-2</sup>     | 800 h           | 8           |
| <b>This work</b>          | <b>1 mA cm<sup>-2</sup>, 1 mAh cm<sup>-2</sup></b> | <b>1600 h</b>   |             |
|                           | <b>5 mA cm<sup>-2</sup>, 1 mAh cm<sup>-2</sup></b> | <b>700 h</b>    |             |

### References for Table S1

- 1 H. Yu, Y. X. Zeng, N. W. Li, D. Y. Luan, L. Yu, X. W. Lou, *Sci. Adv.*, 2022, **8**, eabm5766.
- 2 Q. H. Cao, H. Gao, Y. Gao, J. Yang, C. Li, J. Pu, J. J. Du, J. Y. Yang, D. M. Cai, Z. H. Pan, C. Guan, W. Huang, *Adv. Funct. Mater.*, 2021, **31**, 2103922.
- 3 Y. X. Zeng, X. Y. Zhang, R. F. Qin, X. Q. Liu, P. P. Fang, D. Z. Zheng, Y. X. Tong, X. H. Lu, *Adv. Mater.*, 2019, **31**, 1903675.
- 4 M. Q. Zhou, Z. Wu, R. Wang, G. Q. Sun, S. Q. Zang, *Sci. China Mater.*, 2023, **66**, 1757–1766.
- 5 M. Q. Zhou, G. Q. Sun, S. Q. Zang, *Journal of Energy Chemistry*, 2022, **69**, 76–83.
- 6 S. Kumar, H. Yoon, H. Park, G. Park, S. Suh, H. J. Kim, *Journal of Industrial and Engineering Chemistry*, 2022, **108**, 321–327.

7 J. L. Yang, P. H. Yang, W. Q. Yan, J. W. Zhao, H. J. Fan, *Energy Storage Mater.*, 2022, **51**, 259–265.

8 Y. Liu, F. Tao, Y. B. Xing, Y. F. Pei, F. Z. Ren, *Molecules* 2023, **28**, 1742.
